# Supplementary material for: Reuse of iron ore tailing to potassium silicate synthesis and to the production of geopolymers
Source: Royal Society of Chemistry journal article supplement (doi:10.1039/d3nj03992g), 2023-01-01
Supplement: d3nj03992g2.pdf [file d3nj03992g2.pdf]

Electronic Supplementary Material (ESI) for New Journal of Chemistry.

This journal is © The Royal Society of Chemistry and the Centre National de la Recherche Scientifique 2023
