# Supplementary figures and images for: Reuse of iron ore tailing to potassium silicate synthesis and to the production of geopolymers
Source: Royal Society of Chemistry journal article supplement (doi:10.1039/d3nj03992g), 2023-01-01

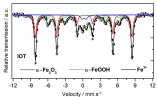

Supplement: d3nj03992g3.pdf [file d3nj03992g3.pdf]

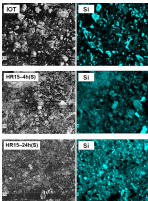

Supplement: d3nj03992g4.pdf [file d3nj03992g4.pdf]
